# Supplementary material for: Validation of HPLC and UHPLC methods for the simultaneous quantification of ferulic acid and nicotinamide in the presence of their degradation products
Source: Royal Society of Chemistry journal article supplement (doi:10.1039/c9ay01451a), 2019-01-01
Supplement: c9ay01451a1.zip [file c9ay01451a1.zip]

| Condition | HPLC | | HPLC | |
| --- | --- | --- | --- | --- |
|  | FEA (%) ± SD | NIC (%) ± SD | FEA (%) ± SD | NIC (%) ± SD |
| Acid | 101.52 ± 0.95 | 101.35 ± 1.01 | 97.42 ± 2.83 | 100.02 ± 1.43 |
| Basic | 100.36 ± 1.14 | 66.33 ± 0.69 | 99.28 ± 1.33 | 68.16 ± 1.31 |
| Oxidative | 101.28 ± 0.48 | 100.58 ± 0.27 | 97.06 ± 2.36 | 101.72 ± 0.33 |
| Light | 80.32 ± 1.49 | 100.69 ± 1.64 | 71.97 ± 6.07 | 98.57 ± 1.40 |
| Heat | 107.58 ± 6.32 | 107.36 ± 6.09 | 98.52 ± 2.78 | 99.90 ± 0.86 |
| Control | 100.1 ± 0.69 | 100.3 ± 1.35 | 100.01 ± 1.91 | 98.07 ± 1.46 |

Table S1 ‒ Content of FEA and NIC in forced degradation studies by HPLC and UHPLC.
